# Supplementary material
Source: MDPI journal article supplement (https://www.mdpi.com/2071-1050/16/2/744)
Supplement: s1 [file s1]

Table S.1. The main contents of the database

| No    | Climate | Type        | Structure System | Area (m <sup>2</sup> ) | Floor | Life | Year of study | Carbon emission (t) |         |         |        | Data Sources |
|-------|---------|-------------|------------------|------------------------|-------|------|---------------|---------------------|---------|---------|--------|--------------|
|       |         |             |                  |                        |       |      |               | Stage 1             | Stage 2 | Stage 3 | LCA    |              |
| XL-1  | I       | Residential | Concrete         | 344.65                 | 3     | 50   | 2021          | 78                  | 13      | 222     | 313    | [1]          |
| XL-2  | II      | Residential | Concrete         | 2200                   | 4     | 70   | 2016          | 489                 | 5       | 6396    | 6890   | [2]          |
| XL-3  | I       | Residential | Concrete         | 6104                   | 16    | 50   | 2015          | 3974                | 275     | 20662   | 24910  | [3]          |
| XL-4  | I       | Public      | Concrete         | 15514                  | 28    | 50   | 2015          | 8796                | 1117    | 54656   | 64569  |              |
| XL-5  | III     | Public      | Concrete         | 16873                  | 15    | 50   | 2016          | 10840               | 1056    | 88237   | 100134 |              |
| XL-6  | II      | Residential | Frame            | 4443.3                 | 15    | 50   | 2011          | 1528                | 188     | 4606    | 6322   | [4]          |
| XL-7  | III     | Residential | Frame            | 3153                   | 7     | 50   | 2014          | 1857                | 142     | 5038    | 7037   | [5]          |
| XL-8  | IV      | Public      | Frame            | 24533.2                | 9     | 50   | 2014          | 10905               | 1400    | 47380   | 59684  | [6]          |
| XL-9  | III     | Public      | Frame            | 20933                  | 5     | 50   | 2011          | 11082               | 3148    | 48673   | 62966  | [7]          |
| XL-10 | IV      | Public      | Frame            | 25023.9                | 5     | 50   | 2016          | 28734               | 1274    | 67960   | 97968  | [8]          |
| XL-11 | I       | Public      | Frame            | 97000                  | 5     | 50   | 2020          | 36811               | 9896    | 422277  | 468983 | [9]          |
| XL-12 | II      | Public      | Frame            | 11351                  | 6     | 50   | 2019          | 9731                | 362     | 52499   | 62592  | [10]         |
| XL-13 | IV      | Public      | Frame            | 130000                 | 4     | 50   | 2018          | 63562               | 14125   | 630983  | 706240 | [11]         |
| XL-14 | II      | Public      | Frame            | 57000                  | 9     | 50   | 2017          | 93445               | 132     | 225822  | 319399 | [12]         |
| XL-15 | II      | Public      | Frame            | 57000                  | 9     | 50   | 2017          | 93122               | 145     | 257171  | 350438 |              |
| XL-16 | I       | Residential | Shear wall       | 327.42                 | 1     | 50   | 2020          | 101                 | 14      | 182     | 297    | [13]         |
| XL-17 | I       | Residential | Shear wall       | 327.42                 | 1     | 50   | 2020          | 117                 | 16      | 182     | 315    | [14]         |
| XL-18 | IV      | Residential | Shear wall       | 133887                 | 33    | 50   | 2015          | 19505               | 1843    | 231802  | 263921 | [15]         |
| XL-19 | II      | Residential | Shear wall       | 39173                  | 32    | 50   | 2019          | 15757               | 517     | 80030   | 96305  | [16]         |
| XL-20 | I       | Residential | Shear wall       | 17559                  | 16    | 50   | 2018          | 7535                | 1439    | 51899   | 60691  | [17]         |
| XL-21 | II      | Residential | Shear wall       | 16432                  | 18    | 50   | 2016          | 7197                | 1342    | 40618   | 49158  | [18]         |

|       |     |             |                  |         |    |    |      |       |      |        |        |      |
|-------|-----|-------------|------------------|---------|----|----|------|-------|------|--------|--------|------|
| XL-22 | IV  | Residential | Frame-shear wall | 10052.2 | 18 | 50 | 2015 | 3730  | 92   | 16878  | 20699  | [15] |
| XL-23 | III | Residential | Frame-shear wall | 16127.2 | 14 | 50 | 2017 | 9505  | 1701 | 31531  | 42737  | [19] |
| XL-24 | IV  | Residential | Frame-shear wall | 4235.21 | 16 | 70 | 2018 | 2003  | 326  | 10237  | 12567  | [20] |
| XL-25 | III | Public      | Frame-shear wall | 44615.6 | 9  | 50 | 2019 | 18111 | 1956 | 116722 | 136786 | [21] |
| XL-26 | III | Public      | Frame-shear wall | 20036.8 | 9  | 50 | 2019 | 8354  | 824  | 57814  | 66994  | [22] |
| XL-27 | III | Residential | Frame-shear wall | 55339   | 15 | 50 | 2013 | 32263 | 5645 | 133962 | 171870 | [23] |
| XL-28 | III | Residential | Brick-concrete   | 1838.7  | 4  | 50 | 2016 | 577   | 35   | 1103   | 1750   | [24] |
| XL-29 | III | Residential | Brick-concrete   | 1459.45 | 4  | 70 | 2013 | 522   | 91   | 1193   | 1807   | [25] |
| XL-30 | I   | Residential | Brick-concrete   | 1335.58 | 5  | 50 | 2012 | 389   | 203  | 2051   | 2644   | [26] |
| XL-31 | III | Residential | Brick-concrete   | 3381.54 | 6  | 50 | 2017 | 2072  | 339  | 6618   | 9029   | [19] |
| XL-32 | I   | Residential | Brick-concrete   | 3248    | 6  | 50 | 2015 | 1985  | 143  | 9695   | 11823  | [3]  |
| XL-33 | III | Residential | Steel-concrete   | 3276.54 | 12 | 50 | 2011 | 1012  | 55   | 3091   | 4158   | [22] |
| XL-34 | III | Residential | Steel-concrete   | 39846   | 6  | 50 | 2012 | 19085 | 603  | 68728  | 88416  | [27] |
| XL-35 | III | Residential | Steel-concrete   | 20239.4 | 17 | 50 | 2012 | 12373 | 621  | 42824  | 55819  | [27] |
| XL-36 | III | Public      | Steel-concrete   | 24261   | 7  | 50 | 2016 | 33196 | 3457 | 70581  | 107234 | [28] |
| XL-37 | II  | Residential | Steel-concrete   | 723     | 2  | 50 | 2011 | 245   | 2    | 3198   | 3445   | [2]  |
| XL-38 | I   | Residential | Masonry          | 3248    | 6  | 50 | 2015 | 1592  | 133  | 9695   | 11420  |      |
| XL-39 | I   | Residential | Masonry          | 6104    | 16 | 50 | 2015 | 3589  | 256  | 20662  | 24508  | [3]  |
| XL-40 | I   | Public      | Masonry          | 15514   | 28 | 50 | 2015 | 8269  | 1086 | 54656  | 64011  |      |
| XL-41 | III | Residential | Steel            | 23450.8 | 29 | 50 | 2019 | 13367 | 3752 | 28375  | 45495  | [29] |
| XL-42 | II  | Public      | Steel            | 50461.1 | 2  | 50 | 2015 | 11045 | 1577 | 134492 | 147028 | [30] |
| XL-43 | II  | Residential | Steel            | 723     | 2  | 50 | 2011 | 201   | 1    | 3191   | 3393   | [2]  |
| XL-44 | I   | Residential | Wood             | 344.65  | 3  | 50 | 2021 | 51    | 9    | 222    | 281    | [1]  |
| XL-45 | V   | Public      | Wood             | 701     | 2  | 50 | 2019 | 106   | 42   | 715    | 863    | [31] |
| XL-46 | II  | Public      | Wood             | 2162    | 1  | 50 | 2019 | 263   | 130  | 2635   | 3029   |      |
| XL-47 | III | Public      | Wood             | 857     | 1  | 50 | 2019 | 98    | 50   | 967    | 1115   | [32] |

|       |     |             |                |         |    |    |      |        |       |        |        |      |
|-------|-----|-------------|----------------|---------|----|----|------|--------|-------|--------|--------|------|
| XL-48 | III | Public      | Wood           | 1172.5  | 2  | 50 | 2019 | 67     | 70    | 1578   | 1715   |      |
| XL-49 | II  | Residential | Wood           | 895     | 4  | 50 | 2021 | 101    | 54    | 1214   | 1368   | [33] |
| XL-50 | III | Public      | Wood           | 4297    | 2  | 50 | 2019 | 675    | 258   | 5747   | 6680   | [32] |
| XL-51 | II  | Residential | Wood           | 30000   | 3  | 50 | 2021 | 412    | 1800  | 46127  | 48340  | [33] |
| XL-52 | II  | Residential | Wood           | 2200    | 4  | 70 | 2016 | 249    | 2     | 5834   | 6087   | [8]  |
| XL-53 | II  | Residential | Wood           | 723     | 2  | 50 | 2011 | 125    | 1     | 2917   | 3043   | [2]  |
| CS-1  | IV  | Public      | Frame          | 27066.7 | 10 | 50 | 2017 | 23384  | 1317  | 52485  | 77186  | [34] |
| CS-2  | II  | Residential | Shear wall     | 39173   | 32 | 50 | 2021 | 15049  | 1154  | 78114  | 94318  | [35] |
| CS-3  | II  | Residential | Wood           | 185     | 2  | 20 | 2021 | 59     | 5     | 194    | 258    | [36] |
| CS-4  | II  | Public      | Steel          | 12878.5 | 5  | 50 | 2019 | 4151   | 141   | 38417  | 42708  | [37] |
| CS-5  | II  | Public      | Steel-concrete | 61179   | 6  | 50 | 2019 | 76229  | 6791  | 42948  | 125968 | [38] |
| CS-6  | IV  | Public      | Steel-concrete | 1601    | 7  | 50 | 2019 | 1138   | 656   | 3618   | 5427   |      |
| CS-7  | IV  | Public      | Steel-concrete | 192181  | 36 | 50 | 2019 | 104931 | 6726  | 134911 | 246568 | [39] |
| CS-8  | III | Residential | Steel-concrete | 4981    | 5  | 50 | 2019 | 1997   | 827   | 430    | 3253   |      |
| CS-9  | III | Public      | Shear wall     | 2347.43 | 3  | 40 | 2019 | 2145   | 20    | 5043   | 7209   | [36] |
| CS-10 | III | Public      | Concrete       | 16873   | 15 | 50 | 2016 | 10603  | 1885  | 73196  | 85667  | [40] |
| CS-11 | I   | Residential | Shear wall     | 17559   | 16 | 50 | 2020 | 7736   | 1595  | 52998  | 62329  | [41] |
| CS-12 | I   | Residential | Shear wall     | 12971   | 17 | 50 | 2020 | 5269   | 1275  | 39676  | 46219  | [42] |
| CS-13 | III | Public      | Frame          | 6367    | 4  | 50 | 2019 | 3167   | 317   | 36600  | 40084  | [39] |
| CS-14 | I   | Public      | Steel-concrete | 36500   | 13 | 50 | 2012 | 26112  | 82663 | 472712 | 581518 | [43] |
| CS-15 | III | Residential | Brick-concrete | 423.4   | 2  | 50 | 2018 | 311    | 2     | 955    | 1267   | [42] |

Table S.2. Fitting analyses for the construction and demolition phases

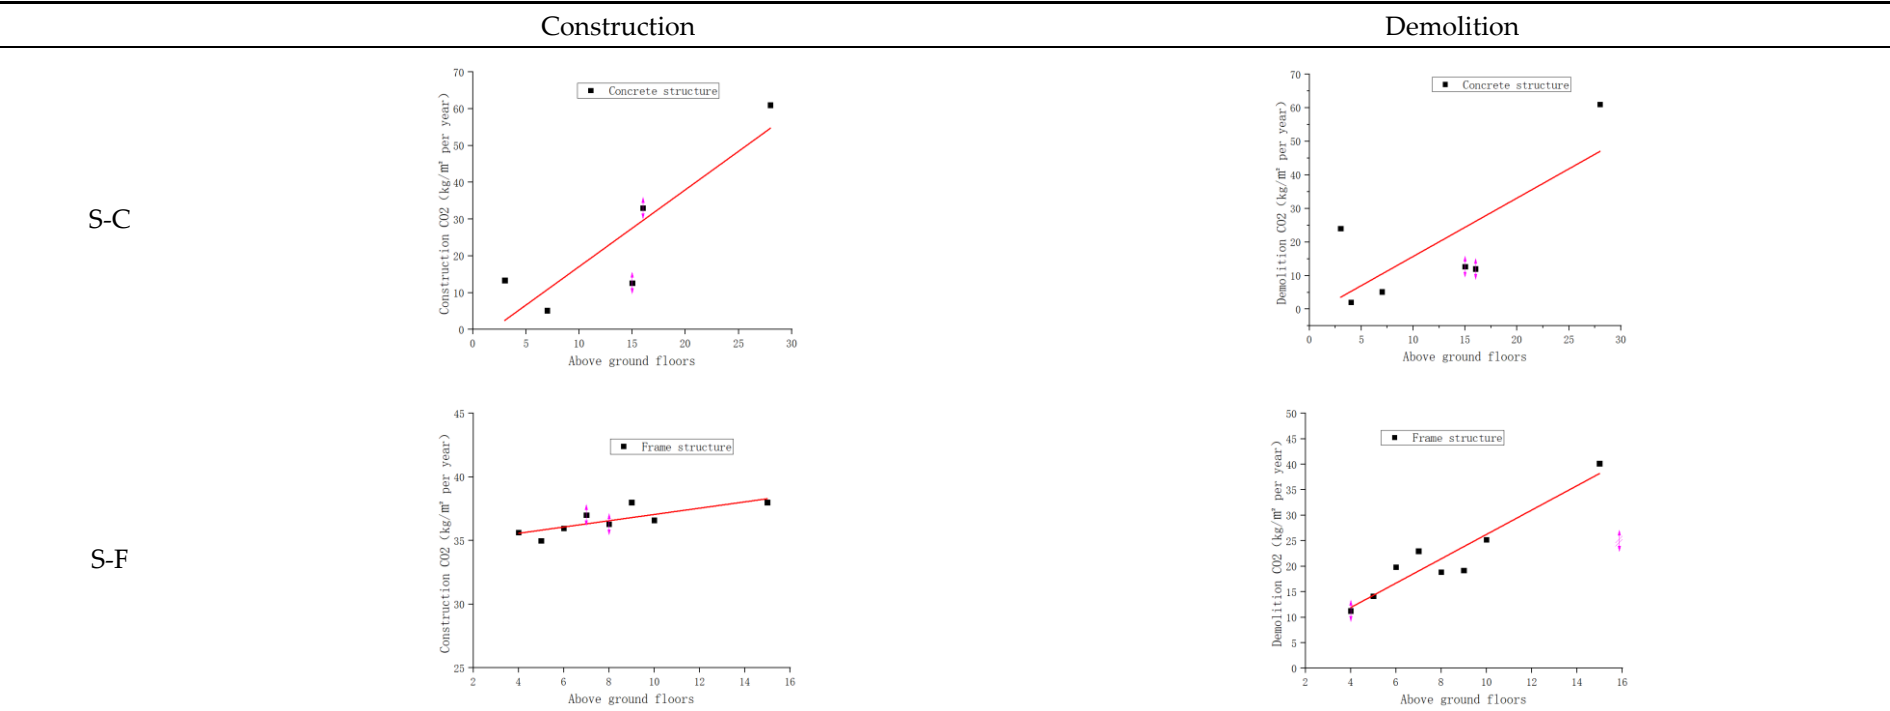

S-FS

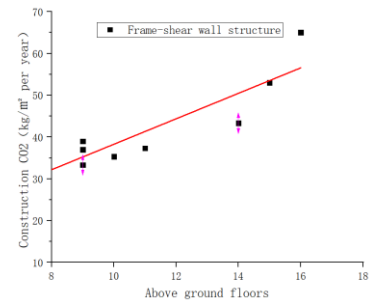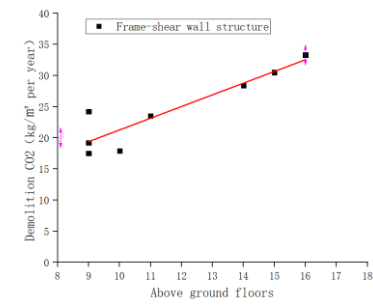

S-SC

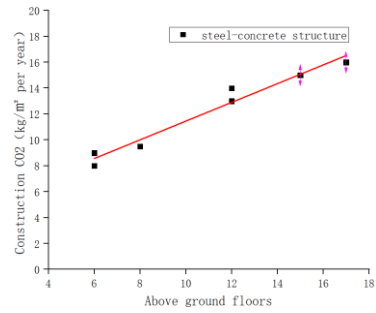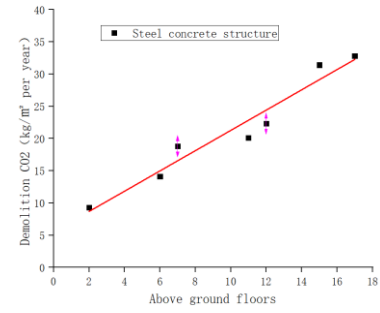

S-M

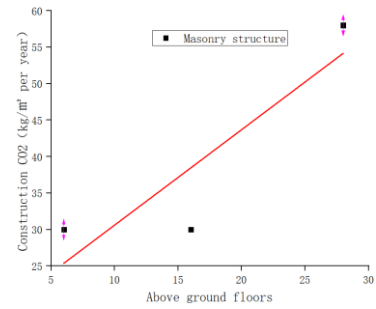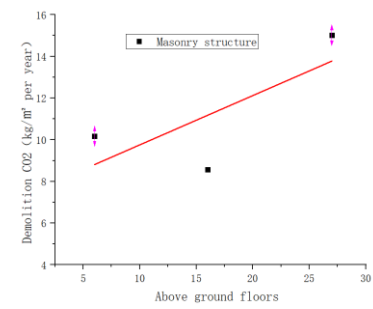

S-S

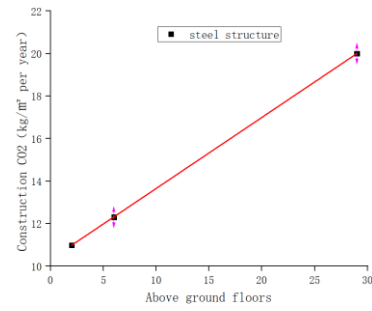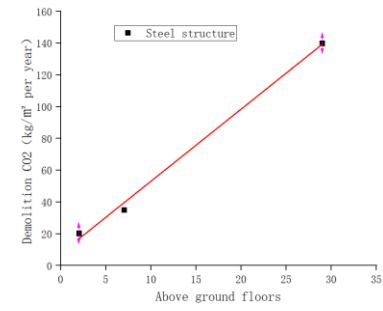

S-W

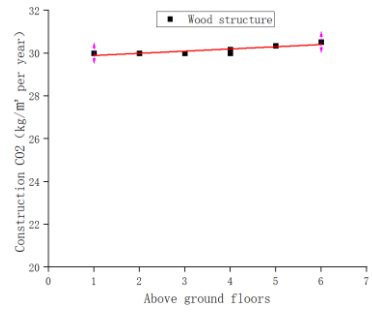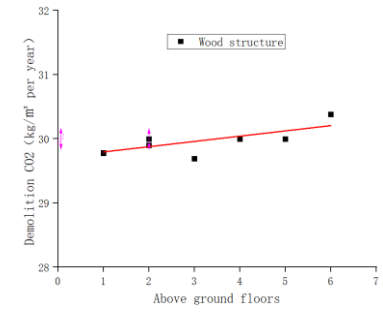

F-R

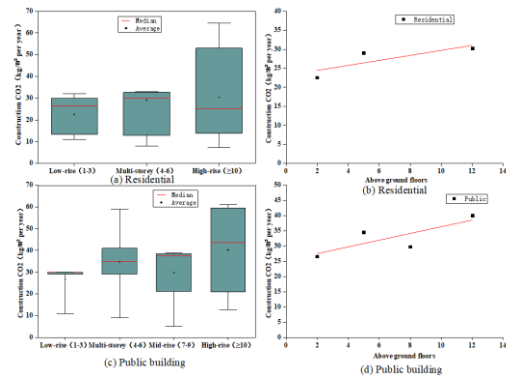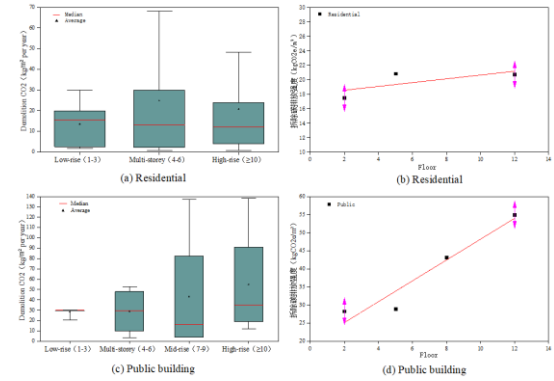

F-P

Table S.3. Energy consumption index of building heating in national standard.

| Province                         | City         | Coal district heating [kgce/(m <sup>2</sup> ·a)] |                                   |                            |                                   | Natural gas heating [Nm <sup>3</sup> /(m <sup>2</sup> ·a)] |                                   |                  |                            |                                   |                  |
|----------------------------------|--------------|--------------------------------------------------|-----------------------------------|----------------------------|-----------------------------------|------------------------------------------------------------|-----------------------------------|------------------|----------------------------|-----------------------------------|------------------|
|                                  |              | Constraint value                                 |                                   | Target value               |                                   | Constraint value                                           |                                   |                  | Target value               |                                   |                  |
|                                  |              | central heating for region                       | central heating for neighbourhood | central heating for region | central heating for neighbourhood | central heating for region                                 | central heating for neighbourhood | Separate heating | central heating for region | central heating for neighbourhood | Separate heating |
| Beijing                          | Beijing      | 7.6                                              | 13.7                              | 4.5                        | 8.7                               | 9.0                                                        | 10.1                              | 8.7              | 4.9                        | 6.6                               | 6.1              |
| Tianjin                          | Tianjin      | 7.3                                              | 13.2                              | 4.7                        | 9.1                               | 8.7                                                        | 9.7                               | 8.4              | 5.1                        | 6.9                               | 6.4              |
| Hebei Province                   | Shijiazhuang | 6.8                                              | 12.1                              | 3.6                        | 6.9                               | 8.0                                                        | 9.0                               | 7.7              | 3.9                        | 5.3                               | 4.8              |
| Shanxi Province                  | Taiyuan      | 8.6                                              | 15.3                              | 5.0                        | 9.7                               | 10.0                                                       | 11.2                              | 9.7              | 5.3                        | 7.3                               | 6.7              |
| Inner Mongolia Autonomous Region | Hohhot       | 10.6                                             | 19.0                              | 6.4                        | 12.4                              | 12.4                                                       | 13.9                              | 12.1             | 6.8                        | 9.3                               | 8.6              |
| Liaoning Province                | Shenyang     | 9.7                                              | 17.3                              | 6.4                        | 12.3                              | 11.4                                                       | 12.7                              | 11.1             | 6.8                        | 9.3                               | 8.6              |
| Jilin Province                   | Changchun    | 10.7                                             | 19.3                              | 7.9                        | 15.4                              | 12.7                                                       | 14.2                              | 12.4             | 8.5                        | 11.7                              | 10.9             |
| Heilongjiang Province            | Harbin       | 11.4                                             | 20.5                              | 8.0                        | 15.5                              | 13.4                                                       | 15.0                              | 13.1             | 8.5                        | 11.7                              | 10.9             |
| Shandong                         | Jinan        | 6.3                                              | 11.1                              | 3.4                        | 6.5                               | 7.4                                                        | 8.2                               | 7.1              | 3.6                        | 4.9                               | 4.5              |

|                   |           |      |      |     |      |      |      |      |     |      |     |
|-------------------|-----------|------|------|-----|------|------|------|------|-----|------|-----|
| Province          |           |      |      |     |      |      |      |      |     |      |     |
| Henan Province    | Zhengzhou | 6.0  | 10.6 | 3.0 | 5.6  | 7.0  | 7.9  | 6.7  | 3.1 | 4.2  | 3.8 |
| Tibet             |           |      |      |     |      |      |      |      |     |      |     |
| Autonomous Region | Lhasa     | 8.4  | 15.2 | 3.6 | 6.9  | 10.0 | 11.2 | 9.7  | 3.9 | 5.3  | 4.8 |
| Shaanxi Province  | Xi'an     | 6.3  | 11.1 | 3.0 | 5.6  | 7.4  | 8.2  | 7.1  | 3.1 | 4.2  | 3.8 |
| Gansu Province    | Lanzhou   | 8.3  | 14.8 | 4.8 | 9.2  | 9.7  | 10.9 | 9.4  | 5.1 | 6.9  | 6.4 |
| Qinghai Province  | Xining    | 10.2 | 18.3 | 5.7 | 11.0 | 12.0 | 13.5 | 11.8 | 6.1 | 8.3  | 7.7 |
| Ningxia Hui       |           |      |      |     |      |      |      |      |     |      |     |
| Autonomous Region | Yinchuan  | 9.1  | 16.3 | 5.7 | 11.0 | 10.7 | 12.0 | 10.4 | 6.1 | 8.3  | 7.7 |
| Xinjiang          |           |      |      |     |      |      |      |      |     |      |     |
| Uygur             |           |      |      |     |      |      |      |      |     |      |     |
| Autonomous Region | Urumqi    | 10.6 | 19.0 | 6.9 | 13.3 | 12.4 | 13.9 | 12.1 | 7.3 | 10.0 | 9.3 |

---

Note: The chart data comes from *Standard for Energy Consumption of Buildings GB/T 51161-2016* .





|                                       |      |      |      |      |      |      |      |      |      |      |      |
|---------------------------------------|------|------|------|------|------|------|------|------|------|------|------|
| Comprehensive shopping mall           |      |      | 9.0  | 8.0  | 7.0  |      |      |      |      |      |      |
| supermarket                           | 13.0 | 11.1 |      |      |      |      |      |      |      |      |      |
| Retail shop                           | 9.6  | 8.2  |      |      |      |      |      |      |      |      |      |
| College teaching building             | 7.8  | 6.0  |      |      |      | 20.1 | 11.9 | 8.8  | 15.6 | 10.1 | 6.7  |
| Complete middle school                |      |      | 11.5 | 9.5  | 8.0  | 19.9 | 10.1 | 8.6  | 15.4 | 8.6  | 5.8  |
| Primary and secondary school building | 8.5  | 6.6  | 11.5 | 9.5  | 8.0  |      |      |      |      |      |      |
| Preschool education institution       |      |      |      |      |      | 21.0 | 9.2  | 7.8  | 16.3 | 13.7 | 7.0  |
| Other educational institution         |      |      |      |      |      | 26.1 | 18.5 | 12.0 | 20.2 | 11.7 | 8.1  |
| Tertiary hospital building            | 15.7 | 13.0 | 21.0 | 16.0 | 12.5 | 29.0 | 19.6 | 13.0 | 26.0 | 17.6 | 11.6 |
| Secondary hospital building           | 14.7 | 12.2 | 21.0 | 16.0 | 12.5 | 25.7 | 17.4 | 11.5 | 23.1 | 15.6 | 8.9  |
| Primary medical institutions          |      |      |      |      |      | 22.8 | 15.4 | 10.2 | 23.3 | 13.8 | 7.6  |
| Other medical institutions            |      |      |      |      |      | 24.4 | 18.4 | 12.6 | 21.0 | 15.8 | 10.4 |
| Rehabilitation center                 | 9.2  | 7.6  |      |      |      |      |      |      |      |      |      |
| Five-star Hotel                       | 13.0 | 10.6 | 12.0 | 9.0  | 7.0  |      |      |      |      |      |      |
| Four-star Hotel                       | 12.6 | 10.3 | 12.0 | 9.0  | 7.0  |      |      |      |      |      |      |

|                                                                        |      |      |      |     |     |      |      |      |      |      |     |
|------------------------------------------------------------------------|------|------|------|-----|-----|------|------|------|------|------|-----|
| Three-star hotel and below                                             | 12.0 | 11.2 | 12.0 | 9.0 | 7.0 |      |      |      |      |      |     |
| Equipment room                                                         | 5.5  | 4.4  |      |     |     |      |      |      |      |      |     |
| Venue institutions<br>(Science and technology, culture, sports venues) |      |      |      |     |     | 21.8 | 15.5 | 10.3 | 22.7 | 11.0 | 6.0 |
| Data source                                                            |      |      |      |     |     |      |      |      |      |      |     |

---

Note: the heating zoning of Shaanxi Province is: Yulin City and Yan'an City belong to heating zone I, Xi'an City, Xianyang City, Baoji City, Shangluo City, Weinan City, Tongchuan City, Yangling Demonstration Area and Hancheng City belong to heating zone II, and Hanzhong City and Ankang City belong to non heating zones.

Table S.5. Statistical data of building heating energy consumption in Beijing in 2020.

| Building type                             |                        | Natural gas<br>(Nm <sup>3</sup> /m <sup>2</sup> ) | Concentrated heat<br>(GJ/m <sup>2</sup> ) |
|-------------------------------------------|------------------------|---------------------------------------------------|-------------------------------------------|
| Large public building                     | Office                 | 3.05                                              | 0.29                                      |
|                                           | Market                 | 3.15                                              | 0.28                                      |
|                                           | Hotel                  | 7.01                                              | 0.3                                       |
|                                           | Healthcare             | 8.42                                              | 0.32                                      |
|                                           | Cultural education     | 7.46                                              | 0.32                                      |
|                                           | Office of state organs | 2.15                                              | 0.29                                      |
|                                           | Building complex       | 1.91                                              | 0.24                                      |
|                                           | Other                  | 1.43                                              | 0.33                                      |
| Small and medium-sized<br>public building | Office                 | 5.31                                              | 0.37                                      |
|                                           | Market                 | 4.58                                              | 0.36                                      |
|                                           | Hotel                  | 6.52                                              | 0.4                                       |
|                                           | Healthcare             | 9.83                                              | 0.47                                      |
|                                           | Cultural education     | 3.62                                              | 0.49                                      |
| Residential building                      |                        | 0.81                                              | 0.27                                      |

Note: The centralized heat can be converted into the consumption of raw coal according to China's *General Rules for Calculation of The Comprehensive Energy Consumption GB/T 2589-2020* , and then the carbon emission of building heating energy consumption can be obtained.

Table S.6. Energy consumption index of equipment in national standard [kWh/(m<sup>2</sup>·a)].

| Building climate zoning                                                                        | Severe cold |        | Cold       |        | Hot summer and cold winter |        | Hot summer and warm winter |        | Temperate  |        |
|------------------------------------------------------------------------------------------------|-------------|--------|------------|--------|----------------------------|--------|----------------------------|--------|------------|--------|
| Constraint value of comprehensive power consumption index of residential buildings [kWh/(a·H)] | 2200        |        | 2700       |        | 3100                       |        | 2800                       |        | 2200       |        |
| Public buildings                                                                               | Constraint  | Target | Constraint | Target | Constraint                 | Target | Constraint                 | Target | Constraint | Target |
| Class A party and government office                                                            | 55          | 45     | 55         | 45     | 70                         | 55     | 65                         | 50     | 50         | 40     |
| Class A commercial office                                                                      | 65          | 55     | 65         | 55     | 85                         | 70     | 80                         | 65     | 65         | 50     |
| Class B party and government office                                                            | 70          | 50     | 70         | 50     | 90                         | 65     | 80                         | 60     | 60         | 45     |
| Class B commercial office                                                                      | 80          | 60     | 80         | 60     | 110                        | 80     | 100                        | 75     | 70         | 55     |
| Class A three-star hotel and below                                                             | 70          | 50     | 70         | 50     | 110                        | 90     | 100                        | 80     | 55         | 45     |
| Class A four-star hotel                                                                        | 85          | 65     | 85         | 65     | 135                        | 115    | 120                        | 100    | 65         | 55     |
| Class A five-star hotel                                                                        | 100         | 80     | 100        | 80     | 160                        | 135    | 130                        | 110    | 80         | 60     |
| Class B three-star hotel and below                                                             | 100         | 70     | 100        | 70     | 160                        | 120    | 150                        | 110    | 60         | 50     |
| Class B four-star hotel                                                                        | 120         | 85     | 120        | 85     | 200                        | 150    | 190                        | 140    | 75         | 60     |
| Class B five-star hotel                                                                        | 150         | 110    | 150        | 110    | 240                        | 180    | 220                        | 160    | 95         | 75     |
| Class A general department stores                                                              | 80          | 60     | 80         | 60     | 130                        | 110    | 120                        | 100    | 80         | 65     |
| Class A general shopping center                                                                | 80          | 60     | 80         | 60     | 130                        | 110    | 120                        | 100    | 80         | 65     |
| Class A general supermarket                                                                    | 110         | 90     | 110        | 90     | 150                        | 120    | 135                        | 105    | 85         | 70     |
| Class A restaurant                                                                             | 60          | 45     | 60         | 45     | 90                         | 70     | 85                         | 65     | 55         | 40     |
| Class A general shops                                                                          | 55          | 40     | 55         | 40     | 90                         | 70     | 85                         | 65     | 55         | 40     |

|                                 |     |     |     |     |     |     |     |     |     |    |
|---------------------------------|-----|-----|-----|-----|-----|-----|-----|-----|-----|----|
| Class B large department stores | 140 | 100 | 140 | 100 | 200 | 170 | 245 | 190 | 90  | 70 |
| Class B shopping mall           | 175 | 135 | 175 | 135 | 260 | 210 | 300 | 245 | 90  | 70 |
| Class B supermarket             | 170 | 120 | 170 | 120 | 225 | 180 | 290 | 240 | 100 | 80 |
| Office building parking garage  | 9   | 6   |     |     |     |     |     |     |     |    |
| Hotel building parking garage   | 15  | 11  |     |     |     |     |     |     |     |    |
| Shopping mall parking garage    | 12  | 8   |     |     |     |     |     |     |     |    |

---

Note: 1) The chart data comes from *Standard for Energy Consumption of Buildings GB/T 51161-2016* ;

2) Among them, the public buildings that can use natural ventilation to meet the indoor temperature comfort requirements and reduce energy consumption by opening external windows are class A public buildings; Public buildings that rely on mechanical ventilation and air conditioning system to maintain indoor temperature comfort all year round are class B public buildings due to restrictions on building function and scale or the surrounding environment of the building.

Table S.7. Energy consumption index of equipment in local standards [kWh/(m<sup>2</sup>·a)].

| Type                                   | Energy consumption index of equipment |         |          |          |                   |                 |
|----------------------------------------|---------------------------------------|---------|----------|----------|-------------------|-----------------|
|                                        | Beijing                               | Tianjin | Shanghai | Shenzhen | Zhejiang Province | Hainan Province |
| Residence                              | 35                                    |         |          |          |                   |                 |
| Student dormitory                      | 31                                    |         |          |          |                   |                 |
| Beadhouse                              | 69                                    |         |          |          |                   |                 |
| Kindergarten                           | 30                                    | 44      |          |          |                   |                 |
| Office building                        | 70                                    | 70      |          | 95       | 130               |                 |
| Party and government office            |                                       | 60      |          | 75       | 80                |                 |
| Shopping Mall                          | 250                                   | 167     |          | 140      | 245               |                 |
| Supermarket                            | 178                                   |         |          | 165      |                   |                 |
| Retail shop                            | 75                                    | 70      |          | 95       |                   |                 |
| Cultural building                      |                                       |         |          |          |                   |                 |
| Sports building                        |                                       |         |          |          |                   |                 |
| Educational building                   |                                       |         |          |          |                   |                 |
| University teaching building           | 66                                    |         |          |          |                   |                 |
| Combined junior and senior high school |                                       | 24      |          |          |                   |                 |
| Secondary school building              | 42                                    | 15      |          |          |                   |                 |
| Primary school building                | 42                                    | 15.5    |          |          |                   |                 |
| Medical and health building            |                                       |         |          |          |                   |                 |
| Class A tertiary hospital              | 163                                   | 114     |          |          |                   |                 |
| Secondary hospital                     | 87                                    | 104     |          |          |                   |                 |
| Rehabilitation center                  | 135                                   |         |          |          |                   |                 |
| Hotel                                  |                                       |         |          | 95       |                   |                 |
| Five-star Hotel                        | 148                                   | 110     | 236.1    | 155      | 145               | 135             |

|                            |     |     |       |     |     |     |
|----------------------------|-----|-----|-------|-----|-----|-----|
| Four-star Hotel            | 101 | 110 | 211.8 | 145 | 105 | 114 |
| Three-star hotel and below | 83  | 95  | 163.2 | 120 | 95  | 110 |
| Underground garage         | 41  |     |       |     |     |     |
| Data source                |     |     |       |     |     |     |

---



Table S.8. Statistical data of building energy consumption in Shanghai and Shenzhen in 2020 (kWh/m<sup>2</sup>).

| Type                         | Shanghai | Shenzhen |
|------------------------------|----------|----------|
| Party and government offices | 82.2     | 78.8     |
| Office building              | 81.5     | 82.1     |
| Tourist hotel building       | 95.8     | 112      |
| Shopping mall                | 140      | 168.9    |
| Medical and health building  | 140.4    |          |
| Comprehensive building       | 88.5     | 80       |
| Educational building         | 37.4     | 71.7     |
| Cultural building            | 85       | 71.7     |
| sports building              | 67.5     |          |
| other building               | 83.5     |          |
| City average                 |          | 96.5     |

Table S.9. Carbon emission factors of major energy sources.

| Type        | Carbon content per<br>unit calorific value<br>(tC/TJ) | Carbon<br>oxidation<br>rate | CO <sub>2</sub> emission factor per<br>calorific value (tCO <sub>2</sub> /TJ) | Low calorific value<br>(kJ/kg、 m <sup>3</sup> ) | CO <sub>2</sub> emission factor<br>(kgCO <sub>2</sub> /kg、 m <sup>3</sup> ) |
|-------------|-------------------------------------------------------|-----------------------------|-------------------------------------------------------------------------------|-------------------------------------------------|-----------------------------------------------------------------------------|
| Raw coal    | 26.4                                                  | 0.98                        | 94.44                                                                         | 20934                                           | 1.98                                                                        |
| Crude       | 20.1                                                  | 0.98                        | 72.23                                                                         | 41868                                           | 3.02                                                                        |
| Gasoline    | 18.9                                                  | 0.98                        | 67.91                                                                         | 43124                                           | 2.93                                                                        |
| Diesel oil  | 20.2                                                  | 0.98                        | 72.59                                                                         | 42705                                           | 3.1                                                                         |
| Fuel oil    | 21.1                                                  | 0.98                        | 71.87                                                                         | 41868                                           | 3.01                                                                        |
| Natural gas | 15.3                                                  | 0.99                        | 55.54                                                                         | 38979                                           | 2.16                                                                        |
| Tap water   |                                                       |                             |                                                                               |                                                 | 0.168 kgCO <sub>2</sub> /t                                                  |

Note: the emission data of CO<sub>2</sub> per unit calorific value and the carbon emission factor of tap water in this table are derived from *Standard for Building Carbon Emission Calculation GB/T 51366-2019*, according to the low calorific value of each fuel in *General Rules for Calculation of The Comprehensive Energy Consumption GB/T 2589-2020*, multiply the two to obtain the CO<sub>2</sub> emission per unit fuel.

Table S.10. Estimated energy consumption list.

| No    | $B_e$                                                          | $EF_e$ | $B_m$ | $EF_m$ | $D$ | $EF_r$ |
|-------|----------------------------------------------------------------|--------|-------|--------|-----|--------|
| XL-1  | 22                                                             | 1.0826 | 11.4  | 1.98   | —   | —      |
| XL-2  | 27                                                             | 0.9419 | —     | —      | 8.7 | 2.16   |
| XL-3  | 22                                                             | 1.0826 | 11.4  | 1.98   | —   | —      |
| XL-4  | 65 (Constraint value of class A commercial office building)    | 1.0826 | 11.4  | 1.98   | —   | —      |
| XL-5  | 90 (Constraint value of class B party and government building) | 0.7921 | —     | —      | —   | —      |
| XL-6  | 15 (180 households)                                            | 0.9419 | —     | —      | 8.7 | 2.16   |
| XL-7  | 27.43 (28 households)                                          | 0.8587 | —     | —      | —   | —      |
| XL-8  | 65 (Constraint value of class A party and government building) | 0.8042 | —     | —      | —   | —      |
| XL-9  | 70 (Constraint value of class A party and government building) | 0.7921 | —     | —      | —   | —      |
| XL-10 | 65 (Target value of class A commercial office building)        | 0.8042 | —     | —      | —   | —      |
| XL-11 | 80 (Constraint value of class A shopping center)               | 1.0826 | 9.7   | 1.98   | —   | —      |
| XL-12 | 65 (Constraint value of class A commercial office building)    | 0.8922 | 6.3   | 1.98   | —   | —      |
| XL-13 | 120 (Constraint value of class A shopping center)              | 0.8042 | —     | —      | —   | —      |
| XL-14 | 65 (Constraint value of class A commercial office building)    | 0.9419 | —     | —      | 8.7 | 2.16   |
| XL-15 | 65 (Constraint value of class A commercial office building)    | 0.9419 | —     | —      | 8.7 | 2.16   |
| XL-16 | 13.44 (2 households)                                           | 1.0826 | 9.7   | 1.98   | —   | —      |
| XL-17 | 13.44 (2 households)                                           | 1.0826 | 9.7   | 1.98   | —   | —      |
| XL-18 | 57.23 (Case study value)                                       | 0.8042 | —     | —      | —   | —      |
| XL-19 | 16.54 (240 households)                                         | 0.8922 | 6.3   | 1.98   | —   | —      |
| XL-20 | 22                                                             | 1.0826 | 11.4  | 1.98   | —   | —      |

|       |                                                             |        |      |      |   |      |
|-------|-------------------------------------------------------------|--------|------|------|---|------|
| XL-21 | 23.66 (144 households)                                      | 0.8922 | 6.3  | 1.98 | — | —    |
| XL-22 | 28                                                          | 0.8042 | —    | —    | — | —    |
| XL-23 | 31                                                          | 0.8587 | —    | —    | — | —    |
| XL-24 | 28                                                          | 0.8042 | —    | —    | — | —    |
| XL-25 | 55 (Target value of class A commercial office building)     | 0.8587 | —    | —    | — | —    |
| XL-26 | 55 (Target value of class A commercial office building)     | 0.8587 | —    | —    | — | —    |
| XL-27 | 50 (Case study value)                                       | 0.7921 | —    | —    | — | —    |
| XL-28 | 26.98 (16 households)                                       | 0.7921 | —    | —    | — | —    |
| XL-29 | 31.86 (15 households)                                       | 0.7921 | —    | —    | — | —    |
| XL-30 | 22                                                          | 1.0826 | 11.4 | 1.98 | — | —    |
| XL-31 | 31                                                          | 0.8587 | —    | —    | — | —    |
| XL-32 | 22                                                          | 1.0826 | 11.4 | 1.98 | — | —    |
| XL-33 | 31 (33 households)                                          | 0.7921 | —    | —    | — | —    |
| XL-34 | 31                                                          | 0.7921 | —    | —    | — | —    |
| XL-35 | 31                                                          | 0.7921 | —    | —    | — | —    |
| XL-36 | 72.64 (Case study value)                                    | 0.7921 | —    | —    | — | —    |
| XL-37 | 27                                                          | 0.9419 | 7.6  | 1.98 | — | —    |
| XL-38 | 22                                                          | 1.0826 | 11.4 | 1.98 | — | —    |
| XL-39 | 22                                                          | 1.0826 | 11.4 | 1.98 | — | —    |
| XL-40 | 65 (Constraint value of class A commercial office building) | 1.0826 | 11.4 | 1.98 | — | —    |
| XL-41 | 25.4 (Case study value)                                     | 0.8042 | —    | —    | — | —    |
| XL-42 | 60.3 (Case study value)                                     | 0.9419 | —    | —    | 9 | 2.16 |
| XL-43 | 27                                                          | 0.9419 | 7.6  | 1.98 | — | —    |
| XL-44 | 22                                                          | 1.0826 | 11.4 | 1.98 | — | —    |
| XL-45 | 40 (Target value of class A party and government building)  | 0.9042 | —    | —    | — | —    |
| XL-46 | 40 (Target value of class A party and government building)  | 0.9419 | 6.8  | 1.98 | — | —    |

|       |                                                                |        |      |      |     |      |
|-------|----------------------------------------------------------------|--------|------|------|-----|------|
| XL-47 | 95.8 (Energy consumption report)                               | 0.7921 | —    | —    | —   | —    |
| XL-48 | 40 (Target value of class A party and government building)     | 0.8587 | —    | —    | —   | —    |
| XL-49 | 27                                                             | 0.8922 | 6.3  | 1.98 | —   | —    |
| XL-50 | 40 (Target value of class A party and government building)     | 0.8587 | —    | —    | —   | —    |
| XL-51 | 27                                                             | 0.9419 | —    | —    | 8.7 | 2.16 |
| XL-52 | 27                                                             | 0.9419 | —    | —    | 8.7 | 2.16 |
| XL-53 | 27                                                             | 0.9419 | 7.6  | 1.98 | —   | —    |
| CS-1  | 44.48 (Case study value)                                       | 0.8042 | —    | —    | —   | —    |
| CS-2  | 16.54 (240 households)                                         | 0.8922 | 6.3  | 1.98 | —   | —    |
| CS-3  | 27                                                             | 0.8922 | 6.3  | 1.98 | —   | —    |
| CS-4  | 55 (Target value of class A commercial office building)        | 0.9419 | 7.3  | 1.98 | 8.7 | 2.16 |
| CS-5  | 27                                                             | 0.8922 | 6.3  | 1.98 | —   | —    |
| CS-6  | 80 (Constraint value of class A commercial office building)    | 0.8042 | —    | —    | —   | —    |
| CS-7  | 50 (Target value of class A party and government building)     | 0.8042 | —    | —    | —   | —    |
| CS-8  | 31                                                             | 0.7921 | —    | —    | —   | —    |
| CS-9  | 55 (Target value of class A commercial office building)        | 0.8587 | —    | —    | —   | —    |
| CS-10 | 90 (Constraint value of class B party and government building) | 0.7921 | —    | —    | —   | —    |
| CS-11 | 22                                                             | 1.0826 | 11.4 | 1.98 | —   | —    |
| CS-12 | 22                                                             | 1.0826 | 11.4 | 1.98 | —   | —    |
| CS-13 | 140 (Energy consumption report)                                | 0.7921 | —    | —    | —   | —    |
| CS-14 | 55 (Constraint value of class A party and government building) | 1.0826 | 9.7  | 1.98 | —   | —    |
| CS-15 | 31                                                             | 0.8587 | —    | —    | —   | —    |

---

Table S.11. Original data and estimation results (t).

| No    | Stage 1       | Stage 2 | Stage 3 | LCA    | Stage 1 |         | Stage 2 |         | Stage 3 | LCA     |         |         |
|-------|---------------|---------|---------|--------|---------|---------|---------|---------|---------|---------|---------|---------|
|       | Original data |         |         |        | Model A | Model B | Model A | Model B |         | Model A | Model B | Model C |
| XL-1  | 78            | 13      | 222     | 313    | 214     | 133     | 2       | 15      | 1132    | 1348    | 1280    | 1241    |
| XL-2  | 489           | 5       | 6396    | 6890   | 1368    | 850     | 21      | 97      | 8036.3  | 9426    | 8984    | 8811.84 |
| XL-3  | 3974          | 275     | 20662   | 24910  | 3797    | 2358    | 332     | 354     | 20147   | 24276   | 22860   | 22096   |
| XL-4  | 8796          | 1117    | 54656   | 64569  | 9650    | 7539    | 1540    | 2422    | 87559   | 98749   | 97520   | 97433   |
| XL-5  | 10840         | 1056    | 88237   | 100134 | 10496   | 8200    | 854     | 1761    | 69060   | 80410   | 79021   | 76869   |
| XL-6  | 1528          | 188     | 4606    | 6322   | 2765    | 1717    | 358     | 253     | 9695    | 12817   | 11664   | 10641   |
| XL-7  | 1857          | 142     | 5038    | 7037   | 1962    | 1218    | 177     | 150     | 5400    | 7539    | 6769    | 5931    |
| XL-8  | 10905         | 1400    | 47380   | 59684  | 15265   | 11923   | 1526    | 1975    | 77252   | 94044   | 91150   | 86012   |
| XL-9  | 11082         | 3148    | 48673   | 62966  | 13025   | 10173   | 1046    | 1352    | 69229   | 83300   | 80754   | 77075   |
| XL-10 | 28734         | 1274    | 67960   | 97968  | 15570   | 12161   | 1250    | 1616    | 78787   | 95608   | 92564   | 87721   |
| XL-11 | 36811         | 9896    | 422277  | 468983 | 60355   | 47140   | 4847    | 6264    | 471927  | 537130  | 525332  | 525208  |
| XL-12 | 9731          | 362     | 52499   | 62592  | 7063    | 5516    | 605     | 778     | 48897   | 56562   | 55192   | 54424   |
| XL-13 | 63562         | 14125   | 630983  | 706240 | 80888   | 63177   | 6098    | 7878    | 696791  | 783777  | 767846  | 775402  |
| XL-14 | 93445         | 132     | 225822  | 319267 | 35466   | 27701   | 3546    | 4589    | 258553  | 297565  | 290843  | 287761  |
| XL-15 | 93122         | 145     | 257171  | 350369 | 35466   | 27701   | 3546    | 4589    | 258553  | 297565  | 290842  | 287761  |
| XL-16 | 101           | 14      | 182     | 297    | 121     | 127     | 19      | 13      | 950     | 1090    | 1090    | 1042    |
| XL-17 | 117           | 16      | 182     | 315    | 121     | 127     | 19      | 13      | 950     | 1090    | 1090    | 1042    |
| XL-18 | 19505         | 1843    | 231802  | 263921 | 49415   | 51728   | 1569    | 10392   | 355075  | 406059  | 417195  | 389571  |
| XL-19 | 15757         | 517     | 80030   | 96305  | 14458   | 15135   | 881     | 2996    | 76988   | 92327   | 95119   | 84526   |
| XL-20 | 7535          | 1439    | 51899   | 60691  | 6481    | 6784    | 1985    | 1020    | 55392   | 63858   | 63196   | 60755   |
| XL-21 | 7197          | 1342    | 40618   | 49158  | 6065    | 6349    | 1809    | 992     | 37982   | 45856   | 45322   | 41684   |

|       |       |      |        |        |       |       |      |      |        |        |        |        |
|-------|-------|------|--------|--------|-------|-------|------|------|--------|--------|--------|--------|
| XL-22 | 3730  | 92   | 16878  | 20699  | 4757  | 3884  | 863  | 607  | 15822  | 21441  | 20312  | 17382  |
| XL-23 | 9505  | 1701 | 31531  | 42737  | 7631  | 6231  | 1146 | 899  | 28607  | 37384  | 35737  | 31417  |
| XL-24 | 2003  | 326  | 10237  | 12567  | 2004  | 1636  | 332  | 246  | 8744   | 11080  | 10626  | 9599   |
| XL-25 | 18111 | 1956 | 116722 | 136786 | 21111 | 21682 | 2344 | 3592 | 124825 | 148280 | 150099 | 139001 |
| XL-26 | 8354  | 824  | 57814  | 66994  | 9481  | 9737  | 1053 | 1613 | 56059  | 66593  | 67409  | 62425  |
| XL-27 | 32263 | 5645 | 133962 | 171870 | 26186 | 21380 | 4136 | 3150 | 134165 | 164486 | 158695 | 147226 |
| XL-28 | 577   | 35   | 1103   | 1750   | 808   | 710   | 79   | 81   | 2712   | 3599   | 3504   | 2980   |
| XL-29 | 522   | 91   | 1193   | 1807   | 641   | 564   | 63   | 65   | 3234   | 3938   | 3863   | 3550   |
| XL-30 | 389   | 203  | 2051   | 2644   | 587   | 516   | 191  | 61   | 4290   | 5068   | 4867   | 4705   |
| XL-31 | 2072  | 339  | 6618   | 9029   | 1485  | 1306  | 240  | 157  | 5869   | 7594   | 7333   | 6446   |
| XL-32 | 1985  | 143  | 9695   | 11823  | 1426  | 1255  | 230  | 151  | 10314  | 11971  | 11720  | 11312  |
| XL-33 | 1012  | 55   | 3091   | 4158   | 1464  | 1266  | 68   | 175  | 5353   | 6885   | 6794   | 5880   |
| XL-34 | 19085 | 603  | 68728  | 88416  | 17802 | 15395 | 500  | 1856 | 64982  | 83284  | 82232  | 71383  |
| XL-35 | 12373 | 621  | 42824  | 55819  | 9043  | 7820  | 563  | 1199 | 33114  | 42720  | 42132  | 36375  |
| XL-36 | 33196 | 3457 | 70581  | 107234 | 10839 | 11790 | 338  | 1760 | 79578  | 90755  | 93128  | 88597  |
| XL-37 | 245   | 2    | 3198   | 3445   | 323   | 279   | 5    | 30   | 1971   | 2299   | 2281   | 2162   |
| XL-38 | 1592  | 133  | 9695   | 11420  | 1745  | 1255  | 119  | 151  | 10535  | 12399  | 11942  | 11555  |
| XL-39 | 3589  | 256  | 20662  | 24508  | 3279  | 2358  | 306  | 354  | 19851  | 23436  | 22564  | 21772  |
| XL-40 | 8269  | 1086 | 54656  | 64011  | 8333  | 7539  | 1028 | 2422 | 86723  | 96084  | 97520  | 97433  |
| XL-41 | 13367 | 3752 | 28375  | 45495  | 8367  | 9060  | 3750 | 1712 | 32205  | 44322  | 42978  | 35399  |
| XL-42 | 11045 | 1577 | 134492 | 147028 | 18004 | 24523 | 1120 | 2656 | 190002 | 209127 | 217182 | 211483 |
| XL-43 | 201   | 1    | 3191   | 3393   | 258   | 279   | 16   | 30   | 1931   | 2205   | 2241   | 2119   |
| XL-44 | 51    | 9    | 222    | 281    | 38    | 133   | 21   | 15   | 425    | 537    | 573    | 468    |
| XL-45 | 106   | 42   | 715    | 863    | 76    | 341   | 42   | 37   | 1406   | 1524   | 1784   | 1544   |
| XL-46 | 263   | 130  | 2635   | 3029   | 235   | 1051  | 129  | 105  | 6537   | 6901   | 7693   | 7170   |
| XL-47 | 98    | 50   | 967    | 1115   | 93    | 416   | 51   | 42   | 3421   | 3565   | 3879   | 3807   |

|       |        |       |        |        |       |       |       |       |        |        |        |        |
|-------|--------|-------|--------|--------|-------|-------|-------|-------|--------|--------|--------|--------|
| XL-48 | 67     | 70    | 1578   | 1715   | 128   | 570   | 70    | 62    | 2245   | 2443   | 2877   | 2465   |
| XL-49 | 101    | 54    | 1214   | 1368   | 97    | 346   | 54    | 40    | 2036   | 2188   | 2422   | 2235   |
| XL-50 | 675    | 258   | 5747   | 6680   | 468   | 2088  | 257   | 226   | 8227   | 8952   | 10542  | 9168   |
| XL-51 | 412    | 1800  | 46127  | 48340  | 3266  | 11591 | 1801  | 1294  | 72257  | 77324  | 85141  | 79293  |
| XL-52 | 249    | 2     | 5834   | 6087   | 240   | 850   | 133   | 97    | 7339   | 7711   | 8287   | 8049   |
| XL-53 | 125    | 1     | 2917   | 3043   | 79    | 279   | 43    | 30    | 1824   | 1945   | 2133   | 2001   |
| CS-1  | 23384  | 1317  | 52485  | 77186  | 16841 | 13154 | 1767  | 2287  | 62900  | 81508  | 78341  | 70064  |
| CS-2  | 15049  | 1154  | 78114  | 94318  | 14458 | 15135 | 881   | 2996  | 76988  | 92327  | 95119  | 84526  |
| CS-3  | 59     | 5     | 194    | 258    | 20    | 71    | 11    | 8     | 178    | 210    | 258    | 196    |
| CS-4  | 4151   | 141   | 38417  | 42708  | 4595  | 4976  | 483   | 585   | 49925  | 55003  | 55486  | 54742  |
| CS-5  | 76229  | 6791  | 42948  | 125968 | 27334 | 23637 | 768   | 2849  | 151767 | 179868 | 178253 | 166534 |
| CS-6  | 1138   | 656   | 3618   | 5427   | 715   | 778   | 22    | 116   | 5796   | 6534   | 6690   | 6452   |
| CS-7  | 104931 | 6726  | 134911 | 246568 | 85863 | 93396 | 10426 | 36122 | 466615 | 562904 | 596133 | 519719 |
| CS-8  | 1997   | 827   | 430    | 3253   | 2225  | 2421  | 56    | 322   | 8121   | 10402  | 10863  | 9052   |
| CS-9  | 2145   | 20    | 5043   | 7209   | 866   | 1141  | 173   | 133   | 5255   | 6294   | 9529   | 5854   |
| CS-10 | 10603  | 1885  | 73196  | 85667  | 10496 | 8200  | 854   | 1761  | 69060  | 80410  | 79021  | 76869  |
| CS-11 | 7736   | 1595  | 52998  | 62329  | 6481  | 6784  | 1985  | 1020  | 55392  | 63858  | 63196  | 60755  |
| CS-12 | 5269   | 1275  | 39676  | 46219  | 4787  | 5011  | 1451  | 768   | 40914  | 47152  | 46693  | 44875  |
| CS-13 | 3167   | 317   | 36600  | 40084  | 3962  | 2460  | 299   | 282   | 38708  | 42968  | 41449  | 43071  |
| CS-14 | 26112  | 82663 | 472712 | 581518 | 16308 | 17738 | 813   | 3519  | 172571 | 189692 | 193829 | 192059 |
| CS-15 | 311    | 2     | 955    | 1267   | 190   | 167   | -291  | 18    | 745    | 645    | 930    | 802    |



## Reference

1. Sim, J.; Sim, J.; Park, C. The Air Emission Assessment of a South Korean Apartment Building's Life Cycle, along with Environmental Impact. *Building and Environment* **2016**, *95*, 104–115, doi:10.1016/j.buildenv.2015.09.008.
2. Sun, L.X.; Dong, H.; Zhou, H. Comparative Analysis and Research on Carbon Emissions in the Whole Life Cycle of Wood Structure and Concrete Structure Houses-Taking the Sino-Canada Cooperation Project TEDA Yuehai Hotel Apartment as an Example, *Construction Science and Technology*. 2016, 05, 14-16+19. (In Chinese).
3. Wang, C.Y. Life Cycle Assessment of Carbon Emissions from Office Buildings in Yangtze River Delta. China, Southeast University, 2016. (In Chinese).
4. She, J.Q.; Zhang, Y.B.; Qi, S.J. Study on Carbon Emission Characteristics and Emission Reduction Strategies of Public Buildings in the Hot Summer and Warm Winter Areas throughout Their Life Cycles-Take Xiamen City as an Example. *Building Science*. 2014, 30(2), 13-18. (In Chinese).
5. Wang, S. Typical Residential Building Life Cycle Carbon Emissions Calculation Model and Case Study. China, Southwest Jiaotong University, 2014. (In Chinese).
6. Rong, P.; Zhang, Y.; Qin, Y.; Liu, G.; Liu, R. Spatial Differentiation of Carbon Emissions from Residential Energy Consumption: A Case Study in Kaifeng, China. *Journal of Environmental Management* **2020**, *271*, 110895, doi:10.1016/j.jenvman.2020.110895.
7. Peng, B. Case Study on Life Cycle Energy Consumption and CO<sub>2</sub> Emissions of Green Buildings. China, Tsinghua University, 2012. (In Chinese).
8. Wang, T.; Seo, S.; Liao, P.-C.; Fang, D. GHG Emission Reduction Performance of State-of-the-Art Green Buildings: Review of Two Case Studies. *Renewable and Sustainable Energy Reviews* **2016**, *56*, 484–493, doi:10.1016/j.rser.2015.11.037.
9. Zou, Y.N. Research on the Calculation of the Whole Life Cycle Carbon Emission and the Carbon Reduction Strategy of Chaoyang Wanda Plaza. China, Shenyang Jianzhu University, 2020. (In Chinese).
10. Yin, S.C. Study of Life-Cycle Carbon Emission in Buildings. China, Harbin Institute of Technology, 2012. (In Chinese).
11. Dong, K.H. Study on Carbon Emission Calculation from the Life-Cycle of Large-Scale Complex Building in the South. China, South China University of Technology, 2018. (In Chinese).
12. Shang, C.J.; Chu, C.L.; Zhang, Z.H. Quantitative Assessment on Carbon Emission of Different Structures in Building Life Cycle. *Building Science*. 2011, 27(12), 66-70+95. (In Chinese).
13. Luo, Z.X. Study on Calculation Method of Building Life Cycle CO<sub>2</sub> Emission and Emission Reduction Strategies. China, Xi'an University of Architecture and Technology, 2016. (In Chinese).
14. Tang, Y.; Chen, L. Research on Carbon Emissions in the Whole Life Cycle of Prefabricated High-Rise Residential Buildings. China, Proceedings of the

- 17th Shenyang Science Annual Conference. 2020, 1862-1867. (In Chinese).
15. Zhang, T. Research on CO<sub>2</sub> Emission Accounting Model and Evaluating System of Low-Carbon Residential Building Based on LCA. China, Anhui University of Technology, 2013. (In Chinese).
  16. Xiong, B.Y. Research on the Measurement of Carbon Emissions in the Whole Life Cycle of Residential Buildings. China, Shenzhen University, 2015. (In Chinese).
  17. Yan, Y. Research on Energy Consumption and CO<sub>2</sub> Emission Evaluation of Buildings in the Whole Life Cycle of Zhejiang Province. China, Zhejiang University, 2011. (In Chinese).
  18. Hu, Z.; Wang, Y.; Zhang, Z.H. The Regional Characteristics and Variation Laws of Urban Household Carbon Emissions: A Study of 47 Cities of Japan. *Urban Development Studies*, 2018 (1). (In Chinese).
  19. Ling, Y. Research on Building Carbon Emissions Assessment of Harbor City. China, Huazhong University of Science and Technology, 2014. (In Chinese).
  20. Zhan, J.; Liu, W.; Wu, F.; Li, Z.; Wang, C. Life Cycle Energy Consumption and Greenhouse Gas Emissions of Urban Residential Buildings in Guangzhou City. *Journal of Cleaner Production* **2018**, *194*, 318–326, doi:10.1016/j.jclepro.2018.05.124.
  21. Zhang, L. Carbon Emission Analysis of a Green Building Project in Enshi, Hubei. *Construction Wall Innovation & Building Energy*, 2019. (In Chinese).
  22. Huang, Z.J.; Zhao, L.L.; Zhang, T. The Assessment Method of Life-Cycle CO<sub>2</sub> Emission for Residential Buildings. *Journal of Civil and Environmental Engineering*, 2011. (In Chinese).
  23. Yang, X.J. Study on Carbon Emission in the Whole Life Cycle of Solar Residential Buildings in Western China. China, Xi'an University of Architecture and Technology, 2020. (In Chinese).
  24. Li, D.; Cui, P.; Lu, Y. Development of an Automated Estimator of Life-Cycle Carbon Emissions for Residential Buildings: A Case Study in Nanjing, China. *Habitat International* **2016**, *57*, 154–163, doi:10.1016/j.habitatint.2016.07.003.
  25. Li, D.Z.; Chen, H.X.; Hui, E.C.M.; Zhang, J.B.; Li, Q.M. A Methodology for Estimating the Life-Cycle Carbon Efficiency of a Residential Building. *Building and Environment* **2013**, *59*, 448–455, doi:10.1016/j.buildenv.2012.09.012.
  26. Zhou, X. Evaluation of CO<sub>2</sub> Emissions in the Life Cycle of Urban Housing in Zhejiang Province. China, Zhejiang University, 2012. (In Chinese).
  27. Ma, J.-J.; Du, G.; Zhang, Z.-K.; Wang, P.-X.; Xie, B.-C. Life Cycle Analysis of Energy Consumption and CO<sub>2</sub> Emissions from a Typical Large Office Building in Tianjin, China. *Building and Environment* **2017**, *117*, 36–48, doi:10.1016/j.buildenv.2017.03.005.
  28. Jia, J. Research on the Carbon Emission of a Green Building in the Whole Life Cycle. *Construction Science and Technology*. 2016, (17), 78-81. (In Chinese).
  29. Zhou, G.G.; Zhou, X.L. Energy Consumption and Carbon Emission Analysis of Steel Structure Buildings Based on Life Cycle Assessment. *Steel Structures*

and Application of Green Technology in Buildings. 2019, 174-180. (In Chinese).

30. Liu, Y. The Carbon Emission Evaluation Model Based on Building Lifecycle. China, Dalian University of Technology, 2015. (In Chinese).
31. Zhang, S.C.; Yang, X.Y.; Xu, W. Calculation of Carbon Emissions in the Whole Life Cycle of Modern Wood Structure Buildings. *Construction Science and Technology*. 2019, (18), 45-48. (In Chinese).
32. Ge, J.; Gong, M.; Zhu, W. Application of Life Cycle Assessment (LCA) in Quantitative Evaluation of Building Environmental Load. *Architecture and Urban Physical Environment in the Process of Urbanization: Proceedings of the Tenth National Conference on Architectural Physics*. 2008, 710-714. (In Chinese).
33. Building Research Establishment (BRE). *Global Methodology for the Environmental Assessment of Buildings Using EN 15978: 2011*. Watford, BRE, 2018.
34. Wang, Y.S.; Yang, X.; Yan, H. Carbon Emission Accounting for Buildings Based on Whole Life Cycle: A Case Study of Reconstruction Project at College in Guangzhou. *Journal of Engineering Management*. 2017, 31(3), 19-24.
35. Li, Y.Y.; Zhang, K.; Li, J.L. Comparative Analysis of Carbon Emission throughout the Life Cycle of Residential Buildings and Carbon Reduction Strategy. *Journal of Xi'an University of Architecture and Technology (Natural Science Edition)*, 2021(5). (In Chinese).
36. Wang, J.Y. BIM-Based Green Building Life Cycle Carbon Emissions Measurement and Benchmarking Research. China, Hunan University of Technology, 2019. (In Chinese).
37. Guo, C.M.; Liu, Q.H.; Li, S.Y. Green Building Life Cycle Carbon Emission Accounting Modelling and Case Analysis Based on Green Building Evaluation System. *Green Building*. 2019, 11(5), 13-18. (In Chinese).
38. Li, H.; Deng, Q.; Zhang, J.; Xia, B.; Skitmore, M. Assessing the Life Cycle CO<sub>2</sub> Emissions of Reinforced Concrete Structures: Four Cases from China. *Journal of Cleaner Production* **2019**, 210, 1496–1506, doi:10.1016/j.jclepro.2018.11.102.
39. Lu, K.; Wang, H. Estimation of Building's Life Cycle Carbon Emissions Based on Life Cycle Assessment and Building Information Modeling: A Case Study of a Hospital Building in China. *GEP* **2019**, 07, 147–165, doi:10.4236/gep.2019.76013.
40. Architectural Institute of Japan (AIJ). *LCA Guidelines for Buildings*, 2003.
41. Zhang, X.; Liu, K.; Zhang, Z. Life Cycle Carbon Emissions of Two Residential Buildings in China: Comparison and Uncertainty Analysis of Different Assessment Methods. *Journal of Cleaner Production* **2020**, 266, 122037, doi:10.1016/j.jclepro.2020.122037.
42. Yang, X.; Hu, M.; Wu, J.; Zhao, B. Building-Information-Modeling Enabled Life Cycle Assessment, a Case Study on Carbon Footprint Accounting for a Residential Building in China. *Journal of Cleaner Production* **2018**, 183, 729–743, doi:10.1016/j.jclepro.2018.02.070.
43. Wu, H.J.; Yuan, Z.W.; Zhang, L.; Bi, J. Life Cycle Energy Consumption and CO<sub>2</sub> Emission of an Office Building in China. *Int J Life Cycle Assess* **2012**, 17,

105–118, doi:10.1007/s11367-011-0342-2.
